# Supplementary material for: Biofilm Formation As a Response to Ecological Competition
Source: PLoS Biol. 2015 Jul 9;13(7):e1002191. doi: 10.1371/journal.pbio.1002191 (PMC4497666; doi:10.1371/journal.pbio.1002191)
Supplement: S1 Data — (XLSX) [file pbio.1002191.s001.xlsx]

## Sheet: Fig1
Panel A
	[Cip]	0	10	20	30	40	50	60	70	80	90	100
	mean (OD)	0.5722	0.4799	0.4367	0.3931	0.28	0.2302	0.1576	0.1214	0.1046	0.0978	0.0796
	SE (OD)	0.0017	0.0032	0.0046	0.0063	0.0054	0.0043	0.0015	0.0008	0.0009	0.0007	0.0009
	[Rif]	0	0.5	1	1.5	2	2.5	3	3.5	4	4.5	5
	mean (OD)	0.5655	0.549	0.4893	0.449	0.3958	0.3195	0.2228	0.1707	0.135	0.1329	0.1311
	SE (OD)	0.0029	0.0012	0.0046	0.0059	0.0045	0.0057	0.0051	0.0056	0.0012	0.0016	0.0013
	[Tet]	0	10	20	30	40	50	60	70	80	90	100
	mean (OD)	0.5591	0.5252	0.463	0.3858	0.3225	0.3084	0.2872	0.2396	0.2071	0.1978	0.1861
	SE (OD)	0.0053	0.002	0.0015	0.0126	0.0087	0.0053	0.0075	0.0037	0.0026	0.003	0.0016
Panel B
	[Cip]	0	10	20	30	40	50	60	70	80	90	100
	mean (OD)	0.4957	0.4775	0.4167	0.3668	0.2808	0.2276	0.1985	0.1802	0.1648	0.154	0.1504
	SE (OD)	0.0068	0.0077	0.009	0.0136	0.0072	0.0049	0.0008	0.0015	0.0011	0.0007	0.0007
	mean (CV)	0.5299	0.6422	0.7338	1.2233	1.4324	1.6767	1.5255	1.1179	0.8541	0.5998	0.515
	SE (CV)	0.0178	0.0187	0.0181	0.0353	0.0326	0.0202	0.0173	0.0308	0.0262	0.0225	0.0108
	[Rif]	0	0.5	1	1.5	2	2.5	3	3.5	4	4.5	5
	mean (OD)	0.410813	0.33495	0.244913	0.207412	0.207038	0.217725	0.214688	0.201712	0.19605	0.187238	0.185475
	SE (OD)	0.0028	0.0023	0.0031	0.0013	0.0007	0.0011	0.0004	0.0005	0.0005	0.0002	0.0004
	mean (CV)	0.567104	0.671279	0.843629	0.762914	0.440213	0.173937	0.09645	0.0759	0.067025	0.0583125	0.0568125
	SE (CV)	0.0042	0.0067	0.0122	0.0083	0.0067	0.0029	0.0008	0.0006	0.0006	0.0003	0.0003
	[Tet]	0	10	20	30	40	50	60	70	80	90	100
	mean (OD)	0.410813	0.33495	0.244913	0.207412	0.207038	0.217725	0.214688	0.201712	0.19605	0.187238	0.185475
	SE (OD)	0.0046	0.0039	0.0014	0.0031	0.0048	0.002	0.0017	0.0006	0.0004	0.001	0.0031
	mean (CV)	0.567104	0.600525	0.646713	0.669637	0.754112	0.885199	0.908634	0.826675	0.680725	0.641837	0.521175
	SE (CV)	0.0042	0.0051	0.0067	0.0058	0.0121	0.0101	0.008	0.0095	0.0086	0.0141	0.0066
Panel C	# strains	1	2	5	10				Panel D			Mean (OD)	SE (OD)	Mean (CV)	SE (CV)
		0.590331	0.785242	2.48037	1.62562					1+4	0	0.385044	0.00649333	1.02907	0.0715284
		2.84434	1.4778	3.48165	2.66808					1+4	0.05	0.362063	0.0107695	0.946369	0.105609
		0.877489	0.978763	1.11022						1+4	0.1	0.341113	0.0100802	1.14207	0.0926042
		0.30677	12.4794	1.32139						1+4	0.25	0.1968	0.0175384	1.7298	0.117447
		0.51904	0.740685	0.940539						1+4	0.5	0.0893505	0.00595123	2.1543	0.106814
		0.65474	0.781749	4.00598						1+4	0.75	0.315113	0.00787511	1.16294	0.107522
		0.401385	1.24912	1.45912						1+4	0.9	0.450638	0.00860677	0.901603	0.0887882
		1.63281	1.46488	2.16831						1+4	0.95	0.497663	0.00953006	0.973803	0.120953
		3.92138	3.58448							1+4	1	0.526326	0.00673105	0.816769	0.0889685
		0.569083	0.647748
		2.93892	1.31702							4+69	0	0.496445	0.014777	0.410986	0.04446
		0.27091	0.595952							4+69	0.05	0.504451	0.0182817	0.598671	0.0701414
		2.29909	0.913862							4+69	0.1	0.513526	0.0198334	0.764237	0.0633156
		0.26295	0.997595							4+69	0.25	0.480488	0.0210816	1.0129	0.0565106
		2.65396	2.14163							4+69	0.5	0.397463	0.0237452	1.77284	0.100773
		1.53827	0.724234							4+69	0.75	0.256688	0.0193198	2.64794	0.11913
		2.81232	0.733025							4+69	0.9	0.217113	0.0163679	2.4054	0.124288
		0.500533	0.456725							4+69	0.95	0.222739	0.0114938	2.16917	0.117597
		0.292067	0.879275							4+69	1	0.357501	0.0097976	1.4104	0.0734566
		1.61807	3.16564
		0.5625	1.14556
		12.534	0.816378
	Median of Biofilm index	0.766114	0.946312	1.81371	2.14685

## Sheet: Fig2
		Mean (OD)	SE (OD)	Mean (CV)	SE (CV)
	69Y	0.443843	0.0164485	0.861937	0.0797383
	69C	0.404172	0.00682165	0.905472	0.0340975
	19Y	0.117896	0.0201388	4.92278	0.127578
	19C	0.0795748	0.0112845	5.80594	0.268796
	7Y	0.508642	0.0162257	0.712607	0.0905167
	7C	0.479524	0.0140101	0.699061	0.0783591
	4Y	0.43713	0.00551243	0.192368	0.0337909
	4C	0.448168	0.00731507	0.235471	0.0382387
	1Y	0.43621	0.00726013	0.852849	0.0694229
	1C	0.436144	0.0048254	1.2312	0.065709
	69C+69Y	0.45663	0.0120091	0.783799	0.0369153
	69C+19Y	0.19467	0.00488583	1.78032	0.0509952
	69C+7Y	0.359142	0.00953441	0.904229	0.029215
	69C+4Y	0.263511	0.00813913	1.39328	0.0356519
	69C+1Y	0.361503	0.00741636	1.14227	0.0337994
	19C+69Y	0.195289	0.00270257	1.52774	0.0605478
	19C+19Y	0.0745723	0.00925531	4.06911	0.13012
	19C+7Y	0.206804	0.00620619	1.54883	0.0632449
	19C+4Y	0.463841	0.00846637	0.266973	0.0112764
	19C+1Y	0.361503	0.00741636	1.1184	0.0543216
	7C+69Y	0.389973	0.0136778	1.01659	0.0622053
	7C+19Y	0.142069	0.00698192	2.40485	0.160072
	7C+7Y	0.485115	0.0101652	0.754637	0.0395625
	7C+4Y	0.394978	0.00890454	0.673321	0.0281245
	7C+1Y	0.222709	0.00815711	1.61447	0.114297
	4C+69Y	0.193186	0.00696828	1.17839	0.0592577
	4C+19Y	0.422799	0.00702947	0.268907	0.0152411
	4C+7Y	0.462075	0.0119703	0.573406	0.0334499
	4C+4Y	0.504779	0.017379	0.183998	0.00912313
	4C+1Y	0.198285	0.00539431	1.21877	0.042894
	1C+69Y	0.386696	0.00543719	1.29734	0.130058
	1C+19Y	0.306315	0.00833419	1.13762	0.085558
	1C+7Y	0.250368	0.0107132	1.20353	0.0866232
	1C+4Y	0.156522	0.0030261	1.43661	0.046617
	1C+1Y	0.415728	0.0108966	1.10292	0.0699328

## Sheet: Fig3
Panel A
			Mean (OD)	SE (OD)	Mean (CV)	SE (CV)
		1(1)	0.163538	0.00477801	0.396639	0.0154144
		1(4)	0.173907	0.0039787	0.488689	0.0128279
		1+4(1+4)	0.125532	0.0028947	0.492239	0.0144504
		4(1)	0.012057	0.00154101	0.0287515	0.00956836
		4(4)	0.170588	0.00440841	0.195402	0.00617559
		4(4)	0.185026	0.0119965	0.180276	0.00664994
		4(69)	0.122063	0.00676245	0.271426	0.0101681
		4+69(4+69)	0.122269	0.00266074	0.484276	0.0160208
		69(4)	0.040782	0.00389862	0.964526	0.0443979
		69(69)	0.203738	0.00271232	0.375901	0.0107215
Panel B
			Mean (OD)	SE (OD)	Mean (CV)	SE (CV)
		H2O, 2.5%	0.422806	0.00686538	0.714628	0.031669
		s4, 2.5%	0.425306	0.00636902	0.678378	0.0276682
		s1, 2.5%	0.269523	0.00818302	1.29302	0.0583453
		s69, 2.5%	0.260773	0.00515379	0.741571	0.0210171
		H2O, 25%	0.417806	0.00410665	0.636747	0.0272501
		s4, 25%	0.416556	0.00353027	0.605497	0.0230302
		s1, 25%	0.265965	0.00615487	0.34906	0.0102994
		s69, 25%	0.264523	0.00365956	1.13405	0.0393005

## Sheet: Fig4
Panel A								Panel B
		Mean (OD)	SE (OD)	Mean (CV)	SE (CV)					Mean (OD)	SE (OD)	Mean (CV)	SE (CV)
	H2O	0.4461	0.013866	0.506313	0.00777419				1-	0.248887	0.00456936	0.658531	0.00856307
	C1 to c7	0.4335	0.0133947	0.874625	0.00922158				1+	0.229838	0.003021	0.675831	0.0086126
	C8	0.27075	0.00856855	0.94185	0.032512				4-	0.434531	0.00510769	0.443562	0.0137178
	C9	0.243375	0.00317738	0.370113	0.0330427				4+	0.3066	0.00488724	0.911625	0.0173341
	C10	0.260569	0.00446528	0.933725	0.0247364				7-	0.269663	0.00434602	0.636419	0.00436409
	C11	0.442537	0.00795315	0.854837	0.0108072				7+	0.24615	0.00558224	0.639181	0.00810031
	C12	0.477394	0.00842021	0.787188	0.0122611				69-	0.2679	0.00271301	0.477406	0.0103741
	C13	0.514594	0.0066673	0.76335	0.0164925				69+	0.24	0.00156396	0.495212	0.0152841
	C14	0.524456	0.00600178	0.77495	0.0164615
	C15	0.515531	0.00789029	0.782475	0.0159431
	C16	0.492769	0.0111723	0.790912	0.0172444
	C17	0.4596	0.0116396	0.685125	0.00956397
	C18	0.486731	0.00892746	0.683937	0.0151604
	C19	0.486806	0.00987645	0.7003	0.0161123
	C20	0.493987	0.00805384	0.678975	0.0168509
	C21	0.493837	0.0067945	0.69905	0.0156388
	C22	0.498	0.00572373	0.75955	0.0117053
	C23	0.5052	0.00642874	0.720825	0.0125106
	C24	0.5247	0.00529301	0.709613	0.00998992
	C25	0.500812	0.00675614	0.720475	0.0138647
	C26	0.499594	0.0058272	0.69825	0.00871413
	C27	0.531562	0.00667052	0.70875	0.0150997
	C28	0.543263	0.00493898	0.680212	0.0109047
	C29	0.548419	0.00702731	0.674612	0.0110515
	C30	0.542869	0.00693554	0.672375	0.0122736
	full sup	0.251569	0.00361376	1.01728	0.013896
	4+69	0.2622	0.00376958	0.865262	0.00950008
Panel C								Panel D
		1-	1+								Mean (OD)	SE (OD)	Mean (CV)	SE (CV)
		0.1099	0.1104							H2O, 2.5%	0.434531	0.0053823	0.443562	0.0144554
		0.1211	0.1228							s4, 2.5%	0.479531	0.00483248	0.378962	0.0118071
		0.1356	0.1356							s14, 2.5%	0.3066	0.00488724	0.911625	0.0173341
		0.2484	0.2425							sDeltaPyo, 2.5%	0.474975	0.00595274	0.411763	0.0122854
		0.4107	0.445							sDeltaRPyo, 2.5%	0.422194	0.0062094	0.485525	0.00645209
		0.5098	0.6063							sDeltaFPyo, 2.5%	0.368119	0.00613979	0.733688	0.015126
		0.5706	0.6628
		0.5623	0.6492							H2O, 25%	0.434531	0.00510769	0.443562	0.0137178
		0.56	0.6297							s4, 25%	0.398775	0.0032009	0.35395	0.00489462
		0.5824	0.6284							s14, 25%	0.117131	0.000959267	0.157775	0.0179465
										sDeltaPyo, 25%	0.407456	0.00225033	0.488088	0.00794387
										sDeltaRPyo, 25%	0.291375	0.00302143	0.60495	0.0170754
		4-	4 + s14	4 + s14m						sDeltaFPyo, 25%	0.117806	0.00193814	0.12355	0.00254046
		0.1041	0.1107	0.1081
		0.1147	0.1189	0.1147
		0.1188	0.1228	0.1388
		0.1991	0.1255	0.2491
		0.37	0.1279	0.48
		0.5003	0.1326	0.6103
		0.6094	0.1403	0.7094
		0.6764	0.154	0.7268
		0.6942	0.1877	0.6642
		0.6429	0.2597	0.5729
		7-	7+
		0.1026	0.1132
		0.114	0.1209
		0.1208	0.1309
		0.1937	0.2009
		0.3615	0.3867
		0.61	0.6276
		0.7029	0.7349
		0.705	0.7588
		0.674	0.7455
		0.6615	0.7236
		69-	69+
		0.1009	0.1105
		0.1119	0.1163
		0.1174	0.1245
		0.1566	0.1806
		0.2288	0.2962
		0.2734	0.3748
		0.3902	0.4685
		0.5633	0.5968
		0.6188	0.6539
		0.6457	0.6511

## Sheet: Fig5
Panel B
		Mean (attached cells)	SE (attached cells)	Mean (biofilm)	SE (biofilm)
	S	74.3333	4.6667	0.0068	0.0018
	M	77	2.6458	0.0316	0.0051
Panel C
		Mean (attached cells)	SE (attached cells)	Mean (biofilm)	SE (biofilm)
	S	50.3333	3.7118	0.024	0.0029
	M	87.3333	1.7638	0.0528	0.003

## Sheet: FigS1
	NUTRIENTS
				1 Low	1+4 Low	4 Low	4+69 Low	69 Low	1 Medium	1+4 Medium	4 Medium	4+69 Medium	69 Medium	1 High	1+4 High	4 High	4+69 High	69 High
			mean (OD)	0.0961508	0.0881258	0.0811133	0.0711757	0.0978007	0.379913	0.375526	0.287888	0.158663	0.210863	0.534563	0.253988	0.869045	0.721426	0.582413
			SE (OD)	0.00243091	0.00275339	0.00374781	0.00321101	0.0047662	0.0213833	0.0143356	0.0130224	0.00749101	0.00663008	0.0260743	0.0177563	0.0130488	0.0633972	0.0268061
			mean (CV)	0.07415	0.24695	0.1264	1.805	0.7747	0.4378	0.7059	0.50155	3.55745	2.8819	2.14115	3.20565	1.0225	7.5355	8.12125
			SE (CV)	0.00314486	0.00850254	0.0323461	0.03263	0.0156933	0.0196313	0.0358749	0.013802	0.160955	0.149674	0.134608	0.257518	0.122928	0.445756	0.605298
	BUFFERING
				1 Unbuff	1+4 Unbuff	4 Unbuff	4+69 Unbuff	69 Unbuff	1 25mM HEPES	1+4 25mM HEPES	4 25mM HEPES	4+69 25mM HEPES	69 25mM HEPES	1 75mM HEPES	1+4 75mM HEPES	4 75mM HEPES	4+69 75mM HEPES	69 75mM HEPES
			mean (OD)	0.379913	0.375526	0.287888	0.158663	0.210863	0.269363	0.383813	0.237863	0.164907	0.230176	0.324207	0.336319	0.398982	0.167513	0.281269
			SE (OD)	0.0213833	0.0143356	0.0130224	0.00749101	0.00663008	0.0190495	0.0196085	0.00819528	0.00853845	0.0129275	0.0131078	0.0130202	0.0127323	0.00846575	0.00447191
			mean (CV)	0.4378	0.7059	0.50155	3.55745	2.8819	0.654902	0.911352	0.639602	4.03075	2.8945	1.16515	1.45075	0.818754	3.49085	2.89555
			SE (CV)	0.0196313	0.0358749	0.013802	0.160955	0.149674	0.0319102	0.0522101	0.043152	0.257249	0.136381	0.0387419	0.0570164	0.0513431	0.109652	0.142333
	IRON
				1 Fe Lim low	1+4 Fe Lim low	4 Fe Lim low	4+69 Fe Lim low	69 Fe Lim low	1 Fe Lim high	1+4 Fe Lim high	4 Fe Lim high	4+69 Fe Lim high	69 Fe Lim high	1 Unlimited	1+4 Unlimited	4 Unlimited	4+69 Unlimited	69 Unlimited
			mean (OD)	0.087939	0.0720952	0.0957765	0.0354015	0.0642203	0.635364	0.583651	0.462508	0.126695	0.489958	0.379913	0.375526	0.287888	0.158663	0.210863
			SE (OD)	0.00290785	0.00214597	0.00125881	0.00118389	0.00160193	0.00947483	0.0113299	0.00523672	0.00720213	0.00345029	0.0213833	0.0143356	0.0130224	0.00749101	0.00663008
			mean (CV)	0.178202	0.306352	0	0.916502	1.6375	1.50035	1.7897	0.630152	4.2614	3.0827	0.4378	0.7059	0.50155	3.55745	2.8819
			SE (CV)	0.0212282	0.0105996	0	0.0183665	0.059555	0.0395733	0.121734	0.0425218	0.19202	0.200059	0.0196313	0.035875	0.013802	0.160955	0.149674
	MEDIA
				1 CAA	1+4 CAA	4 CAA	4+69 CAA	69 CAA	1 LB	1+4 LB	4 LB	4+69 LB	69 LB	1 TB	1+4 TB	4 TB	4+69 TB	69 TB	1 PMM	1+4 PMM	4 PMM	4+69 PMM	69 PMM
			mean (OD)	0.379913	0.375526	0.287888	0.158663	0.210863	0.251006	0.3018	0.535275	0.271219	0.521194	0.539681	0.159263	0.568031	0.441075	0.447412	0.154032	0.151426	0.310051	0.083532	0.198301
			SE (OD)	0.0213833	0.0143356	0.0130224	0.00749101	0.00663008	0.0194728	0.0158685	0.0112545	0.0139402	0.0131328	0.0249578	0.00796221	0.00855674	0.00974601	0.0102874	0.00593203	0.00571238	0.00859102	0.00788544	0.0331046
			mean (CV)	0.4378	0.7059	0.50155	3.55745	2.8819	2.05065	2.11995	0.622904	2.05065	0.999654	0.929854	2.29835	0.806954	2.46205	2.2657	1.52945	1.63815	1.267	3.4138	3.6554
			SE (CV)	0.0196313	0.035875	0.013802	0.160955	0.149674	0.0995041	0.139208	0.053089	0.26457	0.111728	0.137098	0.141022	0.0439499	0.101056	0.106689	0.0647955	0.103488	0.186874	0.305808	0.212963

## Sheet: FigS2
		Mean (OD)	SE (OD)	Mean (CV)	SE (CV)
	0	0.3544	0.0029	0.9602	0.0233
	12.5	0.3319	0.0035	1.0939	0.0242
initial frequency of PA14	25	0.2948	0.0037	1.1809	0.0242
	37.5	0.2528	0.0038	1.1132	0.0328
	50	0.2314	0.0024	1.0277	0.0213
	72.5	0.2271	0.0016	0.8571	0.0101
	75	0.2348	0.0034	0.5748	0.0089
	82.5	0.2583	0.0035	0.3147	0.0124
	100	0.2788	0.0015	0.1651	0.0056

## Sheet: FigS3
	s14	s14DeltaPyo
	0.0819	0.08
	0.0809	0.081
	0.0827	0.0856
	0.0843	0.0904
	0.0873	0.0971
	0.0898	0.1052
	0.0924	0.1152
	0.0958	0.1255
	0.0992	0.138
	0.1033	0.1528

## Sheet: FigS4
	Strain		Mean (OD)	SE (OD)	Mean (CV)	SE (CV)
	6	H2O	0.606975	0.00747534	1.15907	0.0187822
	6	s14	0.5508	0.006537	1.40765	0.0262969
	6	s14DeltaPyo	0.613237	0.00795035	1.12556	0.0419084
	57	H2O	0.385238	0.00814367	0.467075	0.0280454
	57	s14	0.18225	0.00923723	0.9623	0.0187529
	57	s14DeltaPyo	0.366563	0.00697157	0.261425	0.00846274
	PAK	H2O	0.486412	0.022794	1.15128	0.0401765
	PAK	s14	0.299212	0.00327939	1.61103	0.0314777
	PAK	s14DeltaPyo	0.538612	0.0266275	1.13962	0.0341921

## Sheet: FigS5
WT
		Mean (OD)	SE (OD)	Mean (CV)	SE (CV)
	0	0.3367	0.0205	0.6038	0.0452
	0.3	0.2502	0.006	0.8288	0.0309
	0.6	0.2449	0.0093	0.9718	0.0311
	1.2	0.1924	0.0044	1.2335	0.0239
	2.5	0.1844	0.0026	0.9869	0.0396
	5	0.133	0.0005	0.1383	0.0019
Rif resistant
		Mean (OD)	SE (OD)	Mean (CV)	SE (CV)
	0	0.3285	0.0222	1.2853	0.0306
	0.3	0.2881	0.0042	1.2374	0.0246
	0.6	0.288	0.0031	1.2409	0.037
	1.2	0.2743	0.0064	1.268	0.0205
	2.5	0.2532	0.0026	1.2283	0.0218
	5	0.2373	0.003	1.1442	0.04

[truncated: 1 more sheets: FigS10]
